# Supplementary material for: Ecological, Genetic, and Phylogenetic Aspects of YFV 2017–2019 Spread in Rio de Janeiro State
Source: MDPI journal article supplement (doi:10.3390/v15020437), 2023-02-04
Supplement: s1 [file s1]

|           | GenBank  | Host             | Date             | Polyprotein position |    |     |     |     |     |     |     |     |     |     |     |      |      |      |      |      |      |      |      |      |      |      |      |      |  |  |  |
|-----------|----------|------------------|------------------|----------------------|----|-----|-----|-----|-----|-----|-----|-----|-----|-----|-----|------|------|------|------|------|------|------|------|------|------|------|------|------|--|--|--|
|           |          |                  |                  | C                    |    |     |     | prM |     | E   | NS1 |     |     |     |     | NS2A |      | NS2B | NS3  |      |      | NS4A | NS4B | NS5  |      |      |      |      |  |  |  |
|           |          |                  |                  | 79                   | 82 | 103 | 108 | 131 | 254 | 526 | 821 | 826 | 829 | 978 | 993 | 1086 | 1313 | 1417 | 1503 | 1744 | 1831 | 2176 | 2502 | 2644 | 2764 | 2897 | 3128 | 3151 |  |  |  |
|           | MK333804 | NHP              | 17 August 2015   | V                    | R  | Q   | I   | L   | A   | T   | A   | A   | E   | F   | T   | I    | S    | E    | Y    | E    | E    | I    | K    | I    | I    | N    | I    | T    |  |  |  |
| YFV RJ I  | MN643090 | NHP              | 04 February 2018 | .                    | .  | .   | .   | .   | .   | .   | .   | .   | .   | .   | .   | .    | .    | .    | .    | .    | .    | .    | .    | .    | .    | .    | .    | .    |  |  |  |
|           | MN643092 | NHP              | 07 February 2018 | .                    | .  | .   | .   | .   | .   | A   | .   | .   | .   | .   | .   | .    | .    | .    | .    | .    | .    | .    | .    | .    | .    | .    | .    | .    |  |  |  |
|           | MN643091 | NHP              | 07 February 2018 | .                    | .  | .   | .   | .   | .   | .   | .   | .   | .   | .   | .   | .    | .    | .    | .    | .    | .    | .    | .    | .    | .    | .    | .    | .    |  |  |  |
|           | MK333805 | M                | 07 February 2018 | .                    | .  | .   | .   | .   | .   | .   | .   | .   | .   | .   | .   | .    | .    | .    | .    | .    | .    | .    | .    | .    | .    | .    | .    | .    |  |  |  |
|           | MN506266 | M                | 09 January 2018  | .                    | .  | .   | .   | .   | .   | .   | .   | .   | .   | .   | .   | .    | .    | .    | .    | .    | .    | .    | .    | .    | .    | .    | .    | .    |  |  |  |
|           | MN643085 | H                | 11 February 2018 | .                    | .  | .   | .   | .   | .   | .   | .   | .   | .   | .   | .   | .    | .    | .    | .    | .    | .    | .    | .    | .    | .    | .    | .    | .    |  |  |  |
|           | MN643086 | H                | 14 February 2018 | .                    | .  | .   | .   | .   | .   | .   | .   | .   | .   | .   | .   | .    | .    | .    | .    | .    | .    | .    | .    | .    | V    | .    | .    | .    |  |  |  |
|           | MN643087 | H                | 13 February 2018 | .                    | .  | .   | .   | .   | .   | .   | .   | .   | .   | .   | .   | .    | .    | .    | .    | .    | .    | .    | .    | .    | .    | .    | .    | .    |  |  |  |
|           | MN643089 | NHP              | 19 October 2017  | .                    | .  | .   | .   | .   | .   | .   | .   | .   | .   | .   | .   | .    | .    | .    | .    | .    | .    | .    | .    | .    | .    | .    | .    | .    |  |  |  |
|           | MF538786 | NHP              | 05 June 2017     | .                    | .  | .   | .   | .   | .   | .   | .   | .   | .   | .   | .   | .    | .    | .    | .    | .    | .    | .    | .    | .    | .    | .    | .    | .    |  |  |  |
|           | MN506274 | M                | 06 May 2017      | .                    | .  | .   | .   | .   | .   | .   | .   | .   | .   | L   | .   | .    | .    | .    | .    | .    | .    | .    | .    | .    | .    | .    | .    | .    |  |  |  |
|           | MN506269 | M                | 06 May 2017      | .                    | .  | .   | .   | .   | .   | .   | .   | .   | .   | L   | .   | .    | .    | .    | .    | .    | .    | .    | .    | .    | .    | .    | .    | .    |  |  |  |
|           | MN506270 | M                | 05 May 2017      | .                    | .  | .   | .   | .   | .   | .   | .   | .   | .   | L   | .   | .    | .    | .    | .    | .    | .    | .    | .    | .    | .    | .    | .    | .    |  |  |  |
|           | MN506272 | M                | 06 May 2017      | .                    | .  | .   | .   | .   | .   | .   | .   | .   | .   | L   | .   | .    | .    | .    | .    | .    | .    | .    | .    | .    | .    | .    | .    | .    |  |  |  |
|           | MN506283 | M                | 05 May 2017      | .                    | .  | .   | .   | .   | .   | .   | .   | .   | .   | .   | .   | .    | .    | .    | .    | .    | .    | .    | .    | .    | .    | .    | .    | .    |  |  |  |
|           | MN506273 | M                | 05 May 2017      | .                    | .  | .   | .   | .   | .   | .   | .   | .   | .   | .   | .   | .    | .    | .    | .    | .    | .    | .    | .    | .    | .    | .    | .    | .    |  |  |  |
|           | MN506282 | M                | 08 May 2017      | .                    | .  | .   | .   | .   | .   | .   | .   | .   | .   | .   | .   | .    | .    | .    | .    | .    | .    | .    | .    | .    | .    | .    | .    | .    |  |  |  |
|           | MN506281 | M                | 26 April 2017    | .                    | .  | .   | .   | .   | .   | .   | .   | S   | .   | .   | .   | .    | .    | .    | .    | .    | .    | .    | .    | .    | .    | .    | .    | .    |  |  |  |
|           | MN643088 | NHP              | 19 April 2017    | .                    | .  | .   | .   | .   | .   | .   | .   | .   | .   | .   | .   | .    | .    | .    | .    | .    | .    | .    | .    | .    | .    | .    | .    | .    |  |  |  |
|           | MN506268 | M                | 11 May 2017      | .                    | .  | .   | .   | .   | .   | .   | .   | .   | .   | .   | .   | .    | .    | .    | .    | .    | .    | .    | .    | .    | .    | .    | .    | .    |  |  |  |
|           | MN506279 | M                | 04 May 2017      | .                    | .  | .   | .   | .   | .   | .   | .   | .   | .   | .   | .   | .    | .    | .    | .    | .    | .    | .    | .    | .    | .    | .    | .    | .    |  |  |  |
|           | MN506271 | M                | 05 May 2017      | .                    | .  | .   | .   | .   | .   | .   | .   | .   | .   | .   | .   | .    | .    | G    | .    | .    | .    | .    | .    | .    | .    | .    | .    | .    |  |  |  |
|           | MN506280 | M                | 07 May 2017      | .                    | .  | .   | .   | .   | .   | .   | .   | .   | .   | .   | .   | .    | .    | .    | .    | .    | .    | .    | .    | .    | .    | .    | .    | .    |  |  |  |
|           | MN506267 | M                | 08 May 2017      | .                    | .  | .   | .   | .   | .   | .   | .   | .   | .   | .   | .   | .    | .    | .    | .    | .    | .    | .    | .    | T    | .    | .    | .    | .    |  |  |  |
|           | MN506277 | M                | 05 May 2017      | .                    | .  | .   | .   | .   | .   | .   | .   | .   | .   | .   | .   | .    | .    | .    | .    | .    | .    | .    | .    | .    | .    | .    | .    | .    |  |  |  |
|           | MK533792 | NHP              | 10 January 2019  | .                    | .  | R   | .   | .   | .   | .   | .   | .   | .   | D   | .   | .    | .    | .    | G    | .    | .    | .    | .    | .    | .    | K    | M    | I    |  |  |  |
|           | MK882603 | H                | 24 April 2018    | .                    | .  | .   | .   | .   | .   | .   | .   | .   | .   | .   | .   | .    | .    | .    | G    | .    | .    | .    | .    | .    | .    | .    | M    | .    |  |  |  |
|           | MN506275 | M                | 05 May 2017      | .                    | .  | .   | .   | .   | .   | .   | .   | .   | .   | .   | .   | .    | .    | .    | .    | .    | .    | .    | .    | .    | .    | .    | .    | .    |  |  |  |
|           | MF423375 | NHP              | 04 April 2017    | .                    | .  | .   | .   | .   | .   | .   | .   | .   | .   | .   | .   | .    | .    | .    | .    | .    | .    | .    | .    | .    | .    | .    | .    | .    |  |  |  |
|           | MF423376 | NHP              | 13 April 2017    | .                    | .  | .   | .   | .   | .   | .   | .   | .   | .   | .   | .   | .    | .    | .    | .    | .    | .    | .    | .    | .    | .    | .    | .    | .    |  |  |  |
|           | MF434851 | H                | 25 April 2017    | .                    | .  | .   | .   | .   | .   | .   | .   | .   | S   | .   | .   | .    | .    | .    | .    | .    | .    | .    | .    | .    | .    | .    | .    | .    |  |  |  |
|           | MF538783 | H                | 18 March 2017    | .                    | .  | .   | .   | .   | .   | .   | .   | .   | .   | .   | .   | .    | .    | .    | .    | .    | .    | .    | V    | .    | .    | .    | .    | .    |  |  |  |
| MN643081  | H        | 19 February 2018 | .                | .                    | .  | .   | .   | .   | .   | .   | .   | .   | .   | .   | .   | .    | .    | .    | .    | .    | .    | .    | .    | .    | .    | .    | .    |      |  |  |  |
| MN643082  | H        | 16 February 2018 | .                | .                    | .  | .   | S   | .   | .   | .   | .   | .   | .   | .   | .   | .    | .    | .    | .    | .    | .    | .    | .    | .    | .    | .    | .    |      |  |  |  |
| MN506276  | M        | 05 May 2017      | .                | .                    | .  | .   | .   | .   | .   | .   | .   | .   | .   | .   | .   | .    | .    | .    | .    | .    | .    | .    | .    | .    | .    | .    | .    |      |  |  |  |
| MN506278  | M        | 07 May 2017      | .                | .                    | .  | .   | .   | .   | .   | .   | .   | .   | .   | .   | .   | .    | .    | .    | .    | .    | .    | .    | .    | .    | .    | .    | .    |      |  |  |  |
| YFV RJ II | MN506288 | M                | 24 January 2018  | .                    | .  | .   | .   | .   | .   | .   | .   | .   | .   | .   | V   | .    | .    | .    | .    | .    | V    | .    | .    | .    | .    | .    | .    |      |  |  |  |
|           | MN506287 | M                | 24 January 2018  | .                    | .  | .   | .   | .   | .   | .   | .   | .   | .   | .   | V   | .    | .    | .    | .    | .    | V    | .    | .    | .    | .    | .    | .    |      |  |  |  |
|           | MN506289 | M                | 26 January 2018  | .                    | .  | .   | .   | .   | .   | .   | .   | .   | .   | .   | V   | .    | .    | .    | .    | .    | V    | .    | .    | .    | .    | .    | .    |      |  |  |  |
|           | MN506291 | M                | 26 January 2018  | .                    | .  | .   | .   | .   | .   | .   | .   | .   | .   | .   | V   | .    | .    | .    | .    | .    | V    | .    | .    | .    | .    | .    | .    |      |  |  |  |
|           | MN506286 | M                | 24 January 2018  | .                    | .  | .   | .   | .   | .   | .   | .   | .   | .   | .   | V   | .    | .    | .    | .    | .    | V    | .    | .    | .    | .    | .    | .    |      |  |  |  |
|           | MN506285 | M                | 24 January 2018  | .                    | .  | .   | .   | .   | .   | .   | .   | .   | .   | .   | V   | .    | .    | .    | .    | .    | V    | .    | .    | .    | .    | .    | .    |      |  |  |  |
|           | MN506284 | M                | 18 January 2018  | .                    | .  | .   | .   | .   | .   | .   | .   | .   | .   | .   | V   | .    | .    | .    | .    | .    | V    | .    | .    | .    | .    | .    | .    |      |  |  |  |
|           | MK333809 | M                | 19 January 2018  | .                    | .  | .   | .   | .   | .   | .   | .   | .   | .   | .   | .   | .    | .    | .    | .    | .    | .    | V    | .    | .    | .    | .    | .    |      |  |  |  |
|           | MN506290 | M                | 18 January 2018  | .                    | .  | .   | .   | .   | .   | .   | .   | .   | .   | .   | .   | .    | .    | .    | .    | .    | .    | V    | .    | .    | .    | .    | .    |      |  |  |  |
|           | MN643077 | H                | 16 January 2018  | .                    | .  | .   | .   | .   | .   | .   | .   | .   | .   | .   | .   | .    | .    | .    | .    | .    | .    | V    | .    | .    | .    | .    | .    |      |  |  |  |
|           | MN643078 | H                | 25 January 2018  | .                    | .  | .   | .   | .   | .   | .   | .   | .   | .   | .   | .   | .    | .    | .    | .    | .    | .    | V    | .    | .    | .    | .    | .    |      |  |  |  |
|           | MN506265 | M                | 19 December 2017 | .                    | .  | .   | .   | .   | .   | .   | .   | .   | .   | .   | .   | .    | .    | .    | .    | .    | .    | V    | .    | .    | .    | .    | .    |      |  |  |  |
|           | MN643080 | H                | 17 February 2018 | .                    | .  | .   | .   | .   | .   | .   | .   | .   | .   | .   | .   | .    | .    | .    | .    | .    | .    | V    | .    | .    | .    | .    | .    |      |  |  |  |
|           | MN643079 | H                | 26 January 2018  | .                    | .  | .   | .   | .   | .   | .   | .   | .   | .   | .   | .   | .    | .    | .    | .    | .    | .    | V    | .    | .    | .    | .    | .    |      |  |  |  |
|           | MF423378 | NHP              | 19 April 2017    | .                    | .  | .   | .   | .   | .   | .   | .   | .   | .   | .   | .   | .    | .    | .    | .    | .    | .    | V    | .    | .    | .    | .    | .    |      |  |  |  |
|           | MF423377 | NHP              | 19 April 2017    | .                    | .  | .   | .   | .   | .   | .   | .   | .   | .   | .   | .   | .    | .    | .    | .    | .    | .    | V    | .    | .    | .    | .    | .    |      |  |  |  |
|           | MF538785 | NHP              | 21 April 2017    | .                    | .  | .   | .   | .   | .   | .   | .   | .   | .   | .   | .   | .    | .    | .    | .    | .    | .    | V    | .    | .    | .    | .    | .    |      |  |  |  |
|           | MF538784 | H                | 26 February 2017 | .                    | .  | .   | .   | .   | .   | .   | .   | .   | .   | .   | .   | .    | .    | .    | .    | .    | .    | .    | .    | .    | .    | .    | .    |      |  |  |  |
| MN643084  | H        | 25 February 2018 | .                | .                    | .  | .   | .   | .   | .   | .   | .   | .   | .   | .   | L   | .    | H    | .    | G    | .    | E    | .    | .    | .    | .    | .    |      |      |  |  |  |
| MN643083  | H        | 25 February 2018 | .                | .                    | .  | .   | .   | .   | .   | .   | .   | .   | .   | .   | .   | .    | .    | G    | .    | G    | .    | E    | .    | .    | .    | .    |      |      |  |  |  |
| MF538782  | H        | 16 March 2017    | .                | .                    | .  | .   | .   | .   | .   | .   | .   | .   | .   | .   | .   | .    | .    | .    | .    | .    | .    | .    | .    | .    | .    | .    |      |      |  |  |  |
| MK882607  | H        | 09 March 2017    | .                | .                    | .  | .   | .   | .   | .   | .   | .   | .   | .   | .   | .   | .    | .    | .    | .    | .    | .    | .    | .    | .    | .    | .    |      |      |  |  |  |
| MG550109  | H        | 18 April 2017    | A                | K                    | .  | V   | .   | V   | .   | .   | .   | .   | .   | .   | .   | .    | .    | .    | .    | .    | .    | .    | .    | .    | .    | .    |      |      |  |  |  |

**Figure S1.** Amino acid polymorphisms observed in the YFV polyproteins sampled in Rio de Janeiro State. The RJ sequences were aligned with the ancestral sequence MK333804 (strain GO27), which circulated in Goiás State in 2015 (dark blue). The variant amino acid residues are colored in green. The YFV samples belong to the clade RJ I are highlighted in light blue, while those that pertain to the RJ II clade are in orange. A group of RJ YFV clustered in ES clade (not colored). The type of infected host corresponds to: (H) human case, (NHP) non-human primate, and (M) mosquito.

**Table S1.** New YFV genome sequenced from the state Rio de Janeiro state. All samples were originated from localities in the Southeast Atlantic primary river basin, Atlantic Forest biome, Southeast Brazil.

| Conjugated River Basin (Tributary Basin) |                   | County              | Geographic Coordinates      | Strain                     | Date       | Host                     | GenBank               |          |
|------------------------------------------|-------------------|---------------------|-----------------------------|----------------------------|------------|--------------------------|-----------------------|----------|
| Macaé Cconjugated Basin                  | (Macaé)           | Macaé               | 22°11'21.6"S 41°59'48.5"W   | RJ98                       | 2017-04-19 | <i>A.clamitans</i>       | MN643088              |          |
|                                          |                   | Macaé               | 22°18'31.55"S 42°0'1.74"W   | MC941                      | 2017-04-26 | <i>Hg.janthinomys</i>    | MN506281              |          |
|                                          | (São João)        | Maricá              | 22°55'19.41"S 42°42'26.54"W | MR1438                     | 2017-05-04 | <i>Hg.leucocelaenus</i>  | MN506279              |          |
|                                          |                   | Maricá              | 22°55'19.41"S 42°42'26.54"W | MR 976                     | 2017-05-05 | <i>Hg.janthinomys</i>    | MN506283              |          |
|                                          |                   | Maricá              | 22°55'19.41"S 42°42'26.54"W | MR1139                     | 2017-05-05 | <i>Hg.leucocelaenus</i>  | MN506270              |          |
|                                          |                   | Maricá              | 22°55'19.41"S 42°42'26.54"W | MR1140                     | 2017-05-05 | <i>Hg.leucocelaenus</i>  | MN506271              |          |
|                                          |                   | Maricá              | 22°55'19.41"S 42°42'26.54"W | MR1145                     | 2017-05-05 | <i>Hg.leucocelaenus</i>  | MN506277              |          |
|                                          |                   | Maricá              | 22°55'19.41"S 42°42'26.54"W | MR1152                     | 2017-05-05 | <i>Hg.leucocelaenus</i>  | MN506275              |          |
|                                          |                   | Maricá              | 22°55'19.41"S 42°42'26.54"W | MR1158                     | 2017-05-05 | <i>Hg.leucocelaenus</i>  | MN506273              |          |
|                                          |                   | Maricá              | 22°55'19.41"S 42°42'26.54"W | MR1160                     | 2017-05-05 | <i>Hg.leucocelaenus</i>  | MN506276              |          |
|                                          |                   | Maricá              | 22°55'19.41"S 42°42'26.54"W | MR1353                     | 2017-05-06 | <i>Ae.scapularis</i>     | MN506272              |          |
|                                          |                   | Maricá              | 22°55'19.41"S 42°42'26.54"W | MR1356                     | 2017-05-06 | <i>Ae.taeniorhynchus</i> | MN506274              |          |
|                                          |                   | Maricá              | 22°55'19.41"S 42°42'26.54"W | MR1351                     | 2017-05-06 | <i>Hg.leucocelaenus</i>  | MN506269              |          |
|                                          |                   | Maricá              | 22°55'19.41"S 42°42'26.54"W | MR1358                     | 2017-05-07 | <i>Hg.leucocelaenus</i>  | MN506278              |          |
|                                          |                   | Maricá              | 22°55'19.41"S 42°42'26.54"W | MR1391                     | 2017-05-07 | <i>Hg.leucocelaenus</i>  | MN506280              |          |
|                                          |                   | Maricá              | 22°55'19.41"S 42°42'26.54"W | MR 960                     | 2017-05-08 | <i>Hg.janthinomys</i>    | MN506282              |          |
|                                          |                   | Maricá              | 22°55'19.41"S 42°42'26.54"W | MR1044                     | 2017-05-08 | <i>Hg.leucocelaenus</i>  | MN506267              |          |
|                                          |                   | Maricá              | 22°55'19.41"S 42°42'26.54"W | MR1112                     | 2017-05-11 | <i>Hg.leucocelaenus</i>  | MN506268              |          |
|                                          |                   | (Guandú)            | Miguel Pereira              | 22°29'12.05"S 43°18'31.2"W | RJ123      | 2017-10-19               | <i>A.clamitans</i>    | MN643089 |
|                                          |                   |                     | Nova Iguaçu                 | 22°35'0.00"S 43°24'33.00"W | NI3104     | 2018-01-09               | <i>Hg.janthinomys</i> | MN506266 |
| Paraíba do Sul Conjugated Basin          | (Ilha Grande Bay) | Angra dos Reis - IG | 23°08'19.8"S 44°18'47.9"W   | RJ136                      | 2018-02-04 | <i>A. clamitans</i>      | MN643090              |          |
|                                          |                   | Angra dos Reis - IG | 23°11'0.83"S 44°11'56.3"W   | RJ138                      | 2018-02-07 | <i>A. clamitans</i>      | MN643091              |          |
|                                          |                   | Angra dos Reis - IG | 23°11'0.83"S 44°11'56.3"W   | RJ139                      | 2018-02-07 | <i>A. clamitans</i>      | MN643092              |          |
|                                          |                   | Angra dos Reis - IG | 23°09'42.0"S 44°20'52.0"W   | H326                       | 2018-02-11 | <i>H.sapiens</i>         | MN643085              |          |
|                                          |                   | Angra dos Reis - IG | 23°09'42.0"S 44°20'52.0"W   | H333                       | 2018-02-13 | <i>H.sapiens</i>         | MN643087              |          |
|                                          |                   | Angra dos Reis -CO  | 22°52'37.3"S 44°17'04.7"W   | H327                       | 2018-02-14 | <i>H.sapiens</i>         | MN643086              |          |
|                                          | (Paraíba do Sul)  | Teresópolis         | 22°23'17.06"S 42°57'5.47"W  | TR2807                     | 2017-12-19 | <i>Hg.janthinomys</i>    | MN506265              |          |
|                                          |                   | Teresópolis         | 22°23'53.03"S 42°56'49.6"W  | H295                       | 2018-01-16 | <i>H.sapiens</i>         | MN643077              |          |
|                                          |                   | Teresópolis         | 22°15'17.6"S 42°45'07.9"W   | H299                       | 2018-01-25 | <i>H.sapiens</i>         | MN643078              |          |
|                                          |                   | Teresópolis         | 22°10'19.02"S 42°51'22.2"W  | H300                       | 2018-01-26 | <i>H.sapiens</i>         | MN643079              |          |
|                                          |                   | Teresópolis         | 22°26'20.0"S 42°56'17.4"W   | H317                       | 2018-02-16 | <i>H.sapiens</i>         | MN643082              |          |
|                                          |                   | Teresópolis         | 22°16'23.08"S 42°47'58.2"W  | H312                       | 2018-02-17 | <i>H.sapiens</i>         | MN643080              |          |
|                                          |                   | Teresópolis         | 22°26'15.9"S 42°56'19.2"W   | H313                       | 2018-02-19 | <i>H.sapiens</i>         | MN643081              |          |
|                                          |                   | Teresópolis         | 22°26'17.0"S 42°56'51.3"W   | H319                       | 2018-02-25 | <i>H.sapiens</i>         | MN643083              |          |
|                                          |                   | Teresópolis         | 22°26'17.0"S 42°56'51.3"W   | H320                       | 2018-02-25 | <i>H.sapiens</i>         | MN643084              |          |
|                                          |                   | Valença             | 22°10'26.03"S 43°43'25.14"W | VL2909                     | 2018-01-18 | <i>Hg.janthinomys</i>    | MN506290              |          |
|                                          |                   | Valença             | 22°9'45.06"S 43°42'4.18"W   | VL2967                     | 2018-01-18 | <i>Hg.janthinomys</i>    | MN506284              |          |
|                                          |                   | Valença             | 22°9'45.06"S 43°42'4.18"W   | VL2953                     | 2018-01-24 | <i>Hg.janthinomys</i>    | MN506285              |          |
|                                          |                   | Valença             | 22°9'45.06"S 43°42'4.18"W   | VL2964                     | 2018-01-24 | <i>Hg.janthinomys</i>    | MN506288              |          |
|                                          |                   | Valença             | 22°9'45.06"S 43°42'4.18"W   | VL3005                     | 2018-01-24 | <i>Hg.janthinomys</i>    | MN506286              |          |
|                                          |                   | Valença             | 22°9'45.06"S 43°42'4.18"W   | VL3006                     | 2018-01-24 | <i>Hg.janthinomys</i>    | MN506287              |          |
|                                          |                   | Valença             | 22°9'45.06"S 43°42'4.18"W   | VL3012                     | 2018-01-26 | <i>Hg.janthinomys</i>    | MN506289              |          |
|                                          |                   | Valença             | 22°9'45.06"S 43°42'4.18"W   | VL3016                     | 2018-01-26 | <i>Hg.janthinomys</i>    | MN506291              |          |

CO: Continent; IG: Ilha Grande (island).

**Table S2.** YFV samples from Rio de Janeiro State (2017-2019).

| Genbank  | Strain     | Host                              | Collection Date | Location (State)             |
|----------|------------|-----------------------------------|-----------------|------------------------------|
| MF538784 | H196*      | <i>Homo sapiens</i>               | 26/02/2017      | Porciúncula                  |
| MK882607 | RJ182**    | <i>Alouatta sp</i>                | 09/03/2017      | São Sebastião do Alto        |
| MF538782 | H190*      | <i>Homo sapiens</i>               | 16/03/2017      | São Fidélis                  |
| MF538783 | H191*      | <i>Homo sapiens</i>               | 18/03/2017      | Casimiro de Abreu            |
| MF423375 | RJ87*      | <i>Alouatta guariba</i>           | 04/04/2017      | Macaé                        |
| MF423376 | RJ94*      | <i>Alouatta guariba</i>           | 13/04/2017      | Macaé                        |
| MG550109 | H189*      | <i>Homo sapiens</i>               | 18/04/2017      | Maricá                       |
| MF423377 | RJ95*      | <i>Alouatta guariba</i>           | 19/04/2017      | Carmo                        |
| MF423378 | RJ96*      | <i>Alouatta guariba clamitans</i> | 19/04/2017      | Carmo                        |
| MF538785 | RJ97*      | <i>Callithrix sp.</i>             | 21/04/2017      | Petrópolis                   |
| MF434851 | H199*      | <i>Homo sapiens</i>               | 25/04/2017      | Casimiro de Abreu            |
| MF538786 | RJ104*     | <i>Callithrix jacchus</i>         | 05/06/2017      | Guapimirim                   |
| MK333809 | VL2926***  | <i>Hae. janthinomys</i>           | 19/01/2018      | Valença                      |
| MK333805 | IG3036***  | <i>Sa.chloropterus</i>            | 07/02/2018      | Ilha Grande - Angra dos Reis |
| MK882603 | LABFLA10** | <i>Homo sapiens</i>               | 24/04/2018      | Silva Jardim                 |
| MK533792 | RJ155****  | <i>Alouatta guariba</i>           | 10/01/2019      | Casimiro de Abreu            |

\*[20], \*\*[46],\*\*\*[19],\*\*\*\*[15]. Strain= project identifier; Host=Host species; GenBank= GenBank accession number. Ilha Grande=IG (island).

**Table S3.** Comparison of continuous spatial models fit to the 2015-2018 Brazilian YFV dataset and estimate of YFV<sub>2015-2018</sub> lineage dispersal rate under the different models.

|                                         | Homogeneous<br>Brownian diffusion | HeterogeneousRR<br>W Cauchy | HeterogeneousRR<br>W Gamma | HeterogeneousRRW<br>Lognormal |
|-----------------------------------------|-----------------------------------|-----------------------------|----------------------------|-------------------------------|
| PS - Log ML <sup>a</sup>                | -18110                            | -18085                      | -18083                     | -18076/-18094/-18101          |
| PS – Log BF <sup>b</sup>                | 34                                | 9                           | 7                          | Fittest model                 |
| SS - Log ML <sup>a</sup>                | -18111                            | -18085                      | -18084                     | -18078/-18095/-18103          |
| SS – Log BF <sup>b</sup>                | 33                                | 7                           | 6                          | Fittest model                 |
| Dispersal rate<br>(km/day) <sup>c</sup> | 0.3<br>(0.2- 0.5)                 | 0.5<br>(0.4- 0.6)           | 0.5<br>(0.4- 0.6)          | 0.5<br>(0.4- 0.6)             |

<sup>a</sup> Log marginal likelihood (ML) estimates for the different continuous phylogeographic models obtained using the path- sampling (PS) and stepping-stone sampling (SS) methods. <sup>b</sup> The Log Bayes factor (BF) is the difference of the Log ML between of alternative (H1) and null (H0) models (H1/H0). Log BF<sub>s</sub> > 3 indicates that model H1 is more strongly supported by the data than model H0. <sup>c</sup> Posterior mean and 95% HPD (in parenthesis) estimates of the dispersal rate.
